# Supplementary material for: β3-adrenoreceptor blockade reduces tumor growth and increases neuronal differentiation in neuroblastoma via SK2/S1P2 modulation
Source: PubMed Central journal article supplement (PMC6949192; doi:10.1038/s41388-019-0993-1), 2019-09-02

Supplementary – Figure 4

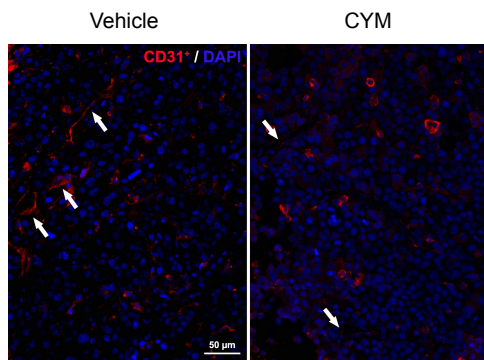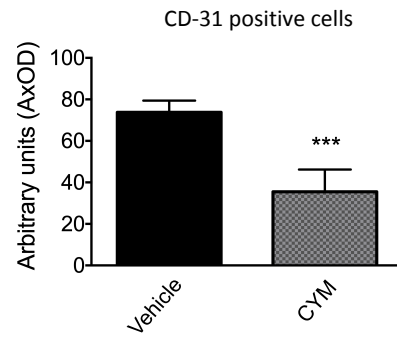

Supplement: 41388_2019_993_MOESM5_ESM.pdf [file 41388_2019_993_MOESM5_ESM.pdf]
